# Supplementary material for: A DFT study of defects in paramagnetic Cr2O3
Source: Royal Society of Chemistry journal article supplement (doi:10.1039/d1cp05756a), 2022-01-01
Supplement: d1cp05756a1.pdf [file d1cp05756a1.pdf]

# DFT Study of Defects in Paramagnetic Cr<sub>2</sub>O<sub>3</sub>

## SUPPORTING INFORMATION

### AFM state

The standard defect formation energies in AFM Cr<sub>2</sub>O<sub>3</sub> are shown in Table 1 with correction energies. The middle of forbidden band at 0 K is 6.96 eV. The pseudo total energy of Cr<sub>2</sub>O<sub>3</sub> is -6073.29 eV per formula unit. The energy of Cr metal obtained by equation fitting is -2375.83 eV per atom.

Table 1. Effective Charge ( $q$ ), Alignment Energy ( $E_{\text{align}}$ ), Finite-Size Elastic Correction Energy ( $E_{\text{corr,elas}}$ ), Finite-Size Electrostatic Correction Energy ( $E_{\text{corr,elec}}$ ) and Standard Defect Formation Energy ( $E_f^0$ ) for defect in  $2 \times 2 \times 2$  supercell of AFM Cr<sub>2</sub>O<sub>3</sub>.

| Defect                         | $q$ | $E_{\text{align}}$ (eV) | $E_{\text{corr,elas}}$ (eV) | $E_{\text{corr,elec}}$ (eV) | $E_f^0$ (eV) |
|--------------------------------|-----|-------------------------|-----------------------------|-----------------------------|--------------|
| V <sub>Cr</sub> <sup>'''</sup> | -3  | 0.91                    | -0.27                       | 1.56                        | 0.26         |
| V <sub>Cr</sub> <sup>''</sup>  | -2  | 0.61                    | -0.10                       | 0.69                        | 0.32         |
| V <sub>Cr</sub> <sup>'</sup>   | -1  | 0.30                    | -0.01                       | 0.17                        | 0.65         |
| V <sub>Cr</sub> <sup>×</sup>   | 0   | 0.00                    | -0.01                       | 0.00                        | 1.25         |
| V <sub>O</sub> <sup>×</sup>    | 0   | 0.00                    | 0.00                        | 0.00                        | 5.42         |
| V <sub>O</sub> <sup>•</sup>    | 1   | -0.04                   | -0.03                       | 0.17                        | 5.87         |
| V <sub>O</sub> <sup>••</sup>   | 2   | -0.17                   | -0.09                       | 0.69                        | 6.76         |
| O <sub>i</sub> <sup>''</sup>   | -2  | 0.08                    | -0.25                       | 0.69                        | 5.66         |
| O <sub>i</sub> <sup>'</sup>    | -1  | 0.02                    | -0.10                       | 0.17                        | 4.76         |
| O <sub>i</sub> <sup>×</sup>    | 0   | 0.00                    | -0.02                       | 0.00                        | 4.49         |
| Cr <sub>i</sub> <sup>×</sup>   | 0   | 0.00                    | -0.15                       | 0.00                        | 10.78        |
| Cr <sub>i</sub> <sup>•</sup>   | 1   | 0.11                    | -0.06                       | 0.17                        | 9.61         |
| Cr <sub>i</sub> <sup>••</sup>  | 2   | 0.18                    | -0.05                       | 0.69                        | 8.66         |
| Cr <sub>i</sub> <sup>•••</sup> | 3   | 0.22                    | -0.12                       | 1.56                        | 7.94         |

Figure 1, Figure 2, Figure 3 and Figure 4 show the DOS spectra in defective AFM Cr<sub>2</sub>O<sub>3</sub> of Cr vacancies, O vacancies, O interstitials and Cr interstitials, respectively. The spectra are very similar to that of bulk Cr<sub>2</sub>O<sub>3</sub> with a band gap near 3.3 eV, except that some intensive discrete states (marked in red) are created near the valence or conduction band, which reduces the effective band gaps.

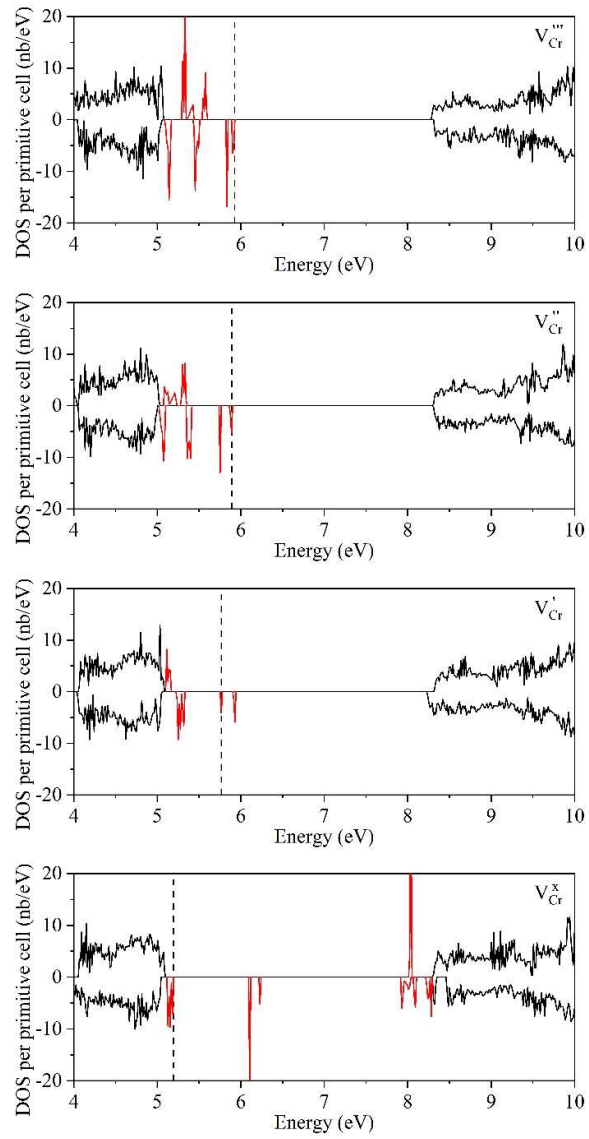

Figure 1. Density of states in defective AFM Cr<sub>2</sub>O<sub>3</sub> with Cr vacancies. The Fermi energy is marked by the vertical dashed line. The states induced by the defect are marked in red.

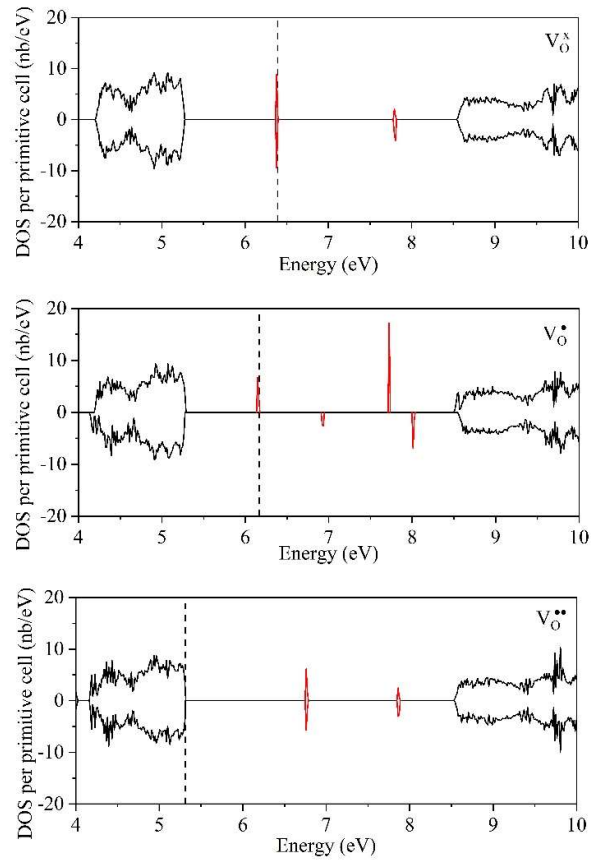

Figure 2. Density of states in defective AFM  $\text{Cr}_2\text{O}_3$  with O vacancies. The Fermi energy is marked by the vertical dashed line. The states induced by the defect are marked in red.

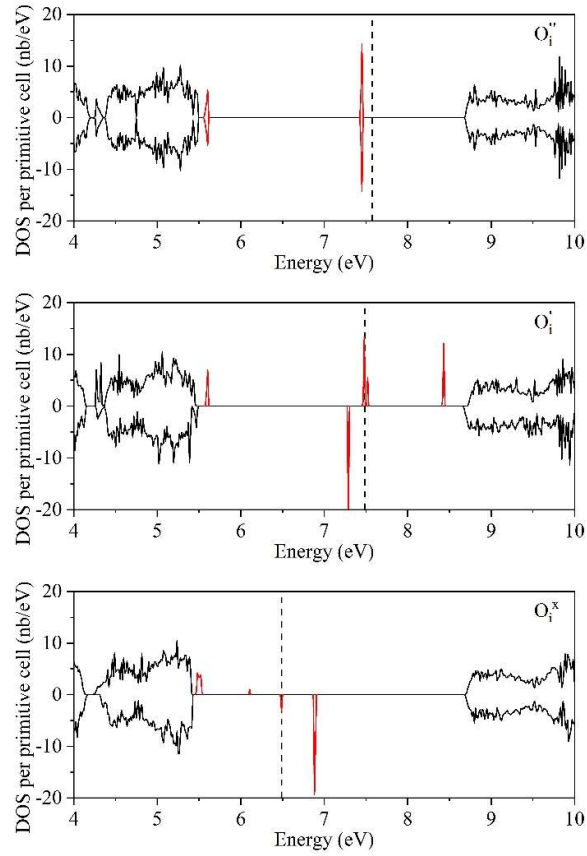

Figure 3. Density of states in defective AFM Cr<sub>2</sub>O<sub>3</sub> with O interstitials. The Fermi energy is marked by the vertical dashed line. The states induced by the defect are marked in red.

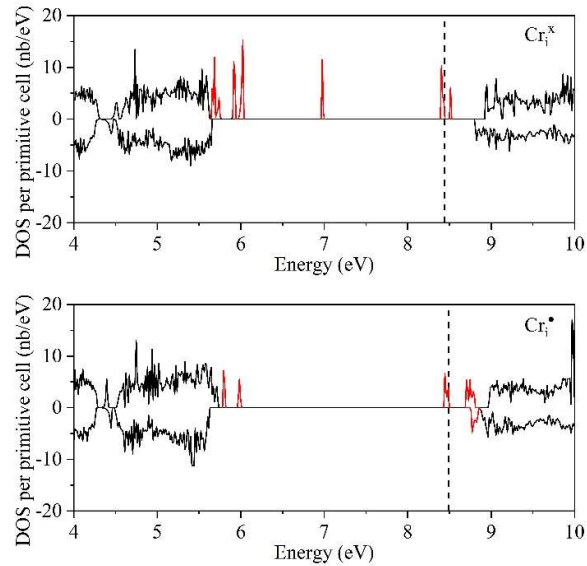

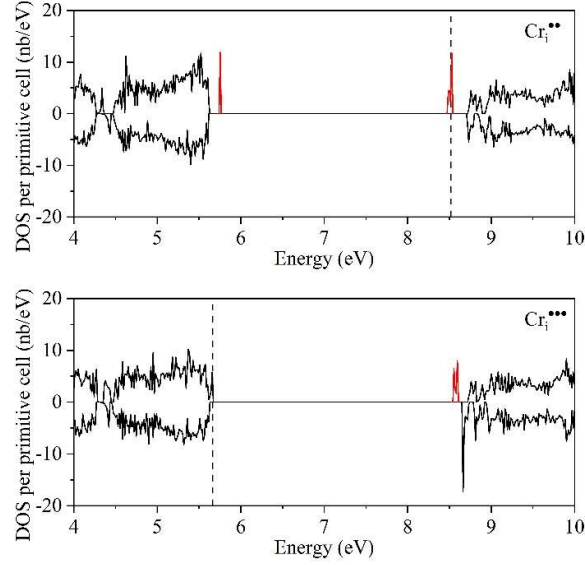

Figure 4. Density of states in defective AFM  $\text{Cr}_2\text{O}_3$  with Cr interstitials. The Fermi energy is marked by the vertical dashed line. The states induced by the defect are marked in red.

## PM state

The standard defect formation energy in PM  $\text{Cr}_2\text{O}_3$  are shown in Table 2 with correction energies. The electrostatic correction energy, alignment energy and atomic chemical potential are the same as in AFM  $\text{Cr}_2\text{O}_3$ . The elastic correction energies of defect with different SQS configurations at different sites are nearly the same and shown in Table 2. The corrected energy of bulk PM  $\text{Cr}_2\text{O}_3$  with 4 SQS configurations after cell-fixed relaxation is nearly the same (-6073.24 eV). The thermal average value at 700 °C of the middle of the band gap is 7.05 eV and this value is chosen to be the reference Fermi level in PM  $\text{Cr}_2\text{O}_3$ .

Table 2. Effective Charge ( $q$ ), Finite-Size Elastic Correction Energy ( $E_{\text{corr,elas}}$ ) and Standard Defect Formation Energy ( $E_f^0$ ) for defect in  $2 \times 2 \times 2$  supercell of PM  $\text{Cr}_2\text{O}_3$ .

|                                       | $q$ | $E_{\text{corr,elas}}$ (eV) | SQS | $E_f^0$ (eV) |       |       |       |
|---------------------------------------|-----|-----------------------------|-----|--------------|-------|-------|-------|
| $V_{\text{Cr}}'''$                    | -3  | -0.30                       | 1   | -0.16        | -0.12 | -0.14 | -0.12 |
|                                       |     |                             | 2   | -0.13        | -0.14 | -0.19 | -0.17 |
|                                       |     |                             | 3   | -0.10        | -0.11 | -0.17 | -0.12 |
|                                       |     |                             | 4   | -0.13        | -0.15 | -0.19 | -0.13 |
| $V_{\text{Cr}}''$                     | -2  | -0.12                       | 1   | -0.09        | -0.00 | -0.09 |       |
| $V_{\text{Cr}}'$                      | -1  | -0.02                       | 1   | 0.55         | 0.29  |       | 0.29  |
| $V_{\text{Cr}}^{\times}$              | 0   | -0.01                       | 1   | 1.31         | 1.05  | 1.16  | 1.05  |
|                                       |     |                             | 2   | 5.38         | 5.40  | 5.45  | 5.40  |
| $V_{\text{O}}^{\times}$               | 0   | 0.00                        | 1   | 5.42         | 5.41  | 5.44  | 5.36  |
|                                       |     |                             | 2   | 5.42         | 5.41  | 5.44  | 5.36  |
| $V_{\text{O}}^{\bullet}$              | 1   | -0.02                       | 1   | 5.92         | 5.94  | 5.84  | 5.94  |
|                                       |     |                             | 2   | 5.83         | 5.98  | 5.93  | 5.90  |
| $V_{\text{O}}^{\bullet\bullet}$       | 2   | -0.08                       | 1   | 6.98         | 6.93  | 6.97  | 6.93  |
|                                       |     |                             | 2   |              | 7.01  | 6.98  | 6.97  |
| $\text{Cr}_i^{\bullet\bullet\bullet}$ | 3   | -0.08                       | 1   | 8.81         | 8.20  | 8.29  | 8.22  |

PM state of  $\text{Cr}_2\text{O}_3$  in this work is simulated by SQS structures generated by Cr atom positions relaxed in AFM state shown in Table 3. The pair-correlation of Cr spins in the SQS vanished between neighbors within 4.2 Å. Table 3 shows these structures with the values of magnetic moment after relaxation

keeping cell shape and dimension fixed as for defect calculations. The initial Cr magnetic moment is set to be  $3 \mu_B$ . The spin directions do not change after relaxation. The atom sites used to calculate vacancy formation energies are in bold. The interstitial sites used in the calculations are in the middle of atoms 8 and 9, of atoms 18 and 19, of atoms 28 and 29 and of atoms 48 and 49.

Table 3. Spin distribution of AFM and SQS  $\text{Cr}_2\text{O}_3$  in reduced rhombohedral coordinates in which the length is  $10.895 \text{ \AA}$  and the angle is  $55.133^\circ$  for the three axis. The positive and negative signs of magnetic moment after relaxation represents respectively the up and down spin directions oriented along  $[111]$  direction in rhombohedral coordinates.

| Number    | Atom      | Position     |              |              | Magnetic moment ( $\mu_B$ ) |              |              |              |              |
|-----------|-----------|--------------|--------------|--------------|-----------------------------|--------------|--------------|--------------|--------------|
|           |           |              |              |              | AFM                         | SQS-1        | SQS-2        | SQS-3        | SQS-4        |
| <b>1</b>  | <b>O</b>  | <b>0.375</b> | <b>0.223</b> | <b>0.027</b> | <b>0.00</b>                 | <b>0.00</b>  | <b>0.00</b>  | <b>-0.01</b> | <b>0.00</b>  |
| 2         | O         | 0.027        | 0.375        | 0.223        | 0.00                        | 0.00         | 0.02         | 0.02         | 0.02         |
| 3         | O         | 0.223        | 0.027        | 0.375        | 0.00                        | -0.02        | 0.00         | 0.01         | -0.01        |
| 4         | O         | 0.125        | 0.277        | 0.473        | 0.00                        | 0.00         | -0.01        | 0.00         | 0.00         |
| 5         | O         | 0.473        | 0.125        | 0.277        | 0.00                        | 0.00         | 0.01         | 0.00         | 0.00         |
| 6         | O         | 0.277        | 0.473        | 0.125        | 0.00                        | 0.00         | 0.02         | 0.00         | 0.02         |
| <b>7</b>  | <b>Cr</b> | <b>0.076</b> | <b>0.076</b> | <b>0.076</b> | <b>2.73</b>                 | <b>2.74</b>  | <b>-2.75</b> | <b>2.71</b>  | <b>2.75</b>  |
| 8         | Cr        | 0.174        | 0.174        | 0.174        | -2.73                       | 2.75         | -2.74        | -2.74        | 2.76         |
| 9         | Cr        | 0.326        | 0.326        | 0.326        | 2.73                        | 2.74         | 2.73         | -2.73        | -2.75        |
| 10        | Cr        | 0.424        | 0.424        | 0.424        | -2.73                       | 2.74         | -2.74        | 2.73         | 2.71         |
| <b>11</b> | <b>O</b>  | <b>0.875</b> | <b>0.223</b> | <b>0.027</b> | <b>0.00</b>                 | <b>0.01</b>  | <b>-0.01</b> | <b>0.01</b>  | <b>0.00</b>  |
| 12        | O         | 0.527        | 0.375        | 0.223        | 0.00                        | -0.01        | 0.00         | 0.00         | 0.00         |
| 13        | O         | 0.723        | 0.027        | 0.375        | 0.00                        | 0.00         | 0.00         | 0.00         | -0.01        |
| 14        | O         | 0.625        | 0.277        | 0.473        | 0.00                        | 0.02         | 0.00         | -0.01        | 0.00         |
| 15        | O         | 0.973        | 0.125        | 0.277        | 0.00                        | -0.02        | 0.01         | 0.00         | -0.02        |
| 16        | O         | 0.777        | 0.473        | 0.125        | 0.00                        | 0.02         | -0.01        | 0.02         | 0.02         |
| <b>17</b> | <b>Cr</b> | <b>0.576</b> | <b>0.076</b> | <b>0.076</b> | <b>2.73</b>                 | <b>-2.75</b> | <b>-2.74</b> | <b>-2.76</b> | <b>2.74</b>  |
| 18        | Cr        | 0.674        | 0.174        | 0.174        | -2.73                       | 2.72         | -2.75        | 2.73         | -2.72        |
| 19        | Cr        | 0.826        | 0.326        | 0.326        | 2.73                        | -2.73        | -2.73        | -2.72        | -2.75        |
| 20        | Cr        | 0.924        | 0.424        | 0.424        | -2.73                       | 2.72         | -2.73        | -2.76        | -2.76        |
| <b>21</b> | <b>O</b>  | <b>0.375</b> | <b>0.723</b> | <b>0.027</b> | <b>0.00</b>                 | <b>0.00</b>  | <b>0.00</b>  | <b>0.00</b>  | <b>-0.01</b> |
| 22        | O         | 0.027        | 0.875        | 0.223        | 0.00                        | 0.00         | 0.01         | 0.00         | -0.02        |
| 23        | O         | 0.223        | 0.527        | 0.375        | 0.00                        | -0.02        | 0.00         | 0.00         | 0.00         |
| 24        | O         | 0.125        | 0.777        | 0.473        | 0.00                        | -0.02        | 0.00         | -0.02        | 0.00         |
| 25        | O         | 0.473        | 0.625        | 0.277        | 0.00                        | 0.01         | -0.01        | 0.01         | 0.01         |
| 26        | O         | 0.277        | 0.973        | 0.125        | 0.00                        | -0.01        | 0.01         | 0.01         | -0.02        |
| <b>27</b> | <b>Cr</b> | <b>0.076</b> | <b>0.576</b> | <b>0.076</b> | <b>2.73</b>                 | <b>2.74</b>  | <b>-2.77</b> | <b>2.73</b>  | <b>-2.74</b> |
| 28        | Cr        | 0.174        | 0.674        | 0.174        | -2.73                       | -2.73        | -2.76        | -2.72        | -2.75        |
| 29        | Cr        | 0.326        | 0.826        | 0.326        | 2.73                        | 2.75         | -2.72        | -2.73        | 2.77         |
| 30        | Cr        | 0.424        | 0.924        | 0.424        | -2.73                       | 2.75         | 2.73         | -2.75        | 2.75         |
| 31        | O         | 0.875        | 0.723        | 0.027        | 0.00                        | 0.01         | 0.00         | 0.00         | 0.00         |
| 32        | O         | 0.527        | 0.875        | 0.223        | 0.00                        | -0.01        | 0.00         | 0.02         | -0.01        |
| 33        | O         | 0.723        | 0.527        | 0.375        | 0.00                        | 0.00         | 0.01         | 0.02         | 0.02         |
| 34        | O         | 0.625        | 0.777        | 0.473        | 0.00                        | 0.00         | -0.01        | -0.01        | 0.01         |
| 35        | O         | 0.973        | 0.625        | 0.277        | 0.00                        | 0.00         | 0.02         | 0.00         | 0.01         |
| 36        | O         | 0.777        | 0.973        | 0.125        | 0.00                        | 0.00         | 0.02         | 0.00         | 0.00         |
| 37        | Cr        | 0.576        | 0.576        | 0.076        | 2.73                        | -2.75        | 2.74         | -2.77        | -2.75        |
| 38        | Cr        | 0.674        | 0.674        | 0.174        | -2.73                       | -2.76        | 2.74         | -2.76        | -2.74        |

|           |           |              |              |              |             |              |             |             |             |
|-----------|-----------|--------------|--------------|--------------|-------------|--------------|-------------|-------------|-------------|
| 39        | Cr        | 0.826        | 0.826        | 0.326        | 2.73        | -2.72        | -2.75       | -2.71       | 2.73        |
| 40        | Cr        | 0.924        | 0.924        | 0.424        | -2.73       | 2.74         | 2.71        | 2.74        | 2.74        |
| <b>41</b> | <b>O</b>  | <b>0.375</b> | <b>0.223</b> | <b>0.527</b> | <b>0.00</b> | <b>-0.01</b> | <b>0.00</b> | <b>0.00</b> | <b>0.00</b> |
| 42        | O         | 0.027        | 0.375        | 0.723        | 0.00        | 0.01         | -0.02       | 0.01        | 0.00        |
| 43        | O         | 0.223        | 0.027        | 0.875        | 0.00        | 0.00         | 0.00        | 0.00        | -0.01       |
| 44        | O         | 0.125        | 0.277        | 0.973        | 0.00        | -0.02        | 0.01        | 0.00        | -0.02       |
| 45        | O         | 0.473        | 0.125        | 0.777        | 0.00        | 0.02         | 0.00        | -0.01       | 0.00        |
| 46        | O         | 0.277        | 0.473        | 0.625        | 0.00        | -0.02        | 0.00        | -0.02       | 0.00        |
| <b>47</b> | <b>Cr</b> | <b>0.076</b> | <b>0.076</b> | <b>0.576</b> | <b>2.73</b> | <b>2.75</b>  | <b>2.74</b> | <b>2.72</b> | <b>2.74</b> |
| 48        | Cr        | 0.174        | 0.174        | 0.674        | -2.73       | -2.72        | 2.74        | -2.73       | -2.73       |
| 49        | Cr        | 0.326        | 0.326        | 0.826        | 2.73        | 2.73         | 2.72        | 2.76        | 2.74        |
| 50        | Cr        | 0.424        | 0.424        | 0.924        | -2.73       | -2.72        | -2.74       | 2.75        | -2.73       |
| 51        | O         | 0.875        | 0.223        | 0.527        | 0.00        | 0.00         | 0.01        | 0.01        | 0.01        |
| 52        | O         | 0.527        | 0.375        | 0.723        | 0.00        | 0.00         | 0.00        | -0.02       | 0.00        |
| 53        | O         | 0.723        | 0.027        | 0.875        | 0.00        | 0.02         | 0.00        | 0.00        | 0.00        |
| 54        | O         | 0.625        | 0.277        | 0.973        | 0.00        | 0.00         | 0.01        | 0.00        | 0.00        |
| 55        | O         | 0.973        | 0.125        | 0.777        | 0.00        | 0.00         | -0.01       | 0.00        | 0.00        |
| 56        | O         | 0.777        | 0.473        | 0.625        | 0.00        | 0.00         | -0.02       | -0.01       | 0.02        |
| 57        | Cr        | 0.576        | 0.076        | 0.576        | 2.73        | -2.74        | -2.72       | 2.75        | 2.74        |
| 58        | Cr        | 0.674        | 0.174        | 0.674        | -2.73       | -2.75        | 2.74        | 2.76        | -2.71       |
| 59        | Cr        | 0.826        | 0.326        | 0.826        | 2.73        | -2.74        | 2.74        | -2.73       | 2.70        |
| 60        | Cr        | 0.924        | 0.424        | 0.924        | -2.73       | -2.74        | 2.76        | -2.75       | -2.75       |
| 61        | O         | 0.375        | 0.723        | 0.527        | 0.00        | -0.01        | 0.00        | 0.01        | -0.01       |
| 62        | O         | 0.027        | 0.875        | 0.723        | 0.00        | 0.01         | 0.00        | 0.00        | 0.00        |
| 63        | O         | 0.223        | 0.527        | 0.875        | 0.00        | 0.00         | 0.00        | -0.02       | 0.00        |
| 64        | O         | 0.125        | 0.777        | 0.973        | 0.00        | 0.00         | 0.02        | 0.00        | 0.01        |
| 65        | O         | 0.473        | 0.625        | 0.777        | 0.00        | 0.00         | -0.01       | -0.02       | 0.02        |
| 66        | O         | 0.277        | 0.973        | 0.625        | 0.00        | 0.00         | -0.01       | 0.00        | 0.00        |
| 67        | Cr        | 0.076        | 0.576        | 0.576        | 2.73        | 2.75         | 2.75        | 2.73        | -2.72       |
| 68        | Cr        | 0.174        | 0.674        | 0.674        | -2.73       | 2.76         | -2.72       | 2.77        | 2.74        |
| 69        | Cr        | 0.326        | 0.826        | 0.826        | 2.73        | 2.72         | -2.74       | 2.75        | 2.73        |
| 70        | Cr        | 0.424        | 0.924        | 0.924        | -2.73       | -2.74        | 2.74        | -2.74       | 2.75        |
| 71        | O         | 0.875        | 0.723        | 0.527        | 0.00        | 0.00         | -0.01       | 0.00        | -0.01       |
| 72        | O         | 0.527        | 0.875        | 0.723        | 0.00        | 0.00         | 0.00        | 0.00        | -0.02       |
| 73        | O         | 0.723        | 0.527        | 0.875        | 0.00        | 0.02         | -0.02       | 0.01        | 0.00        |
| 74        | O         | 0.625        | 0.777        | 0.973        | 0.00        | 0.02         | -0.02       | 0.02        | 0.01        |
| 75        | O         | 0.973        | 0.625        | 0.777        | 0.00        | -0.01        | 0.00        | -0.01       | 0.00        |
| 76        | O         | 0.777        | 0.973        | 0.625        | 0.00        | 0.01         | 0.00        | -0.02       | 0.00        |
| 77        | Cr        | 0.576        | 0.576        | 0.576        | 2.73        | -2.74        | 2.74        | 2.74        | -2.74       |
| 78        | Cr        | 0.674        | 0.674        | 0.674        | -2.73       | 2.73         | 2.75        | 2.74        | -2.74       |
| 79        | Cr        | 0.826        | 0.826        | 0.826        | 2.73        | -2.75        | 2.75        | -2.73       | 2.74        |
| 80        | Cr        | 0.924        | 0.924        | 0.924        | -2.73       | -2.75        | -2.74       | 2.73        | -2.72       |

In this work, PM state of Cr metal is tried to be simulated by SQS structures generated by Cr atom positions relaxed in AFM state shown in Table 4. The pair-correlation of Cr spins in the SQS almost vanished between neighbors within 5.0 Å. Table 4 shows these structures with the values of magnetic moment after relaxation keeping cell shape and dimension fixed. The initial Cr magnetic moment is set to be 4  $\mu_B$ . The spin directions do not change after relaxation.

Table 4. Spin distribution of AFM and SQS Cr metal in Cartesian coordinates in which the commensurate length is 9.490 Å for the three axis. The positive and negative signs of magnetic moment after relaxation represents respectively the up and down spin directions oriented along [001] direction in Cartesian coordinates.

| Number | Position |       |       | Magnetic moment ( $\mu_B$ ) |       |       |       |
|--------|----------|-------|-------|-----------------------------|-------|-------|-------|
|        |          |       |       | AFM                         | SQS1  | SQS2  | SQS3  |
| 1      | 0.000    | 0.000 | 0.000 | 3.35                        | -3.53 | 3.53  | -3.47 |
| 2      | 0.167    | 0.167 | 0.167 | -3.35                       | -3.43 | 3.57  | 3.52  |
| 3      | 0.333    | 0.000 | 0.000 | 3.35                        | -3.52 | 3.51  | 3.54  |
| 4      | 0.500    | 0.167 | 0.167 | -3.35                       | -3.54 | -3.52 | -3.43 |
| 5      | 0.667    | 0.000 | 0.000 | 3.35                        | -3.49 | -3.43 | 3.55  |
| 6      | 0.833    | 0.167 | 0.167 | -3.35                       | 3.49  | 3.45  | -3.50 |
| 7      | 0.000    | 0.333 | 0.000 | 3.35                        | -3.55 | 3.57  | 3.49  |
| 8      | 0.167    | 0.500 | 0.167 | -3.35                       | -3.49 | 3.45  | 3.49  |
| 9      | 0.333    | 0.333 | 0.000 | 3.35                        | 3.50  | -3.46 | -3.50 |
| 10     | 0.500    | 0.500 | 0.167 | -3.35                       | 3.55  | 3.49  | -3.49 |
| 11     | 0.667    | 0.333 | 0.000 | 3.35                        | -3.56 | -3.35 | -3.61 |
| 12     | 0.833    | 0.500 | 0.167 | -3.35                       | 3.49  | 3.39  | 3.47  |
| 13     | 0.000    | 0.667 | 0.000 | 3.35                        | 3.48  | -3.49 | -3.50 |
| 14     | 0.167    | 0.833 | 0.167 | -3.35                       | -3.44 | 3.44  | 3.50  |
| 15     | 0.333    | 0.667 | 0.000 | 3.35                        | -3.49 | 3.48  | 3.47  |
| 16     | 0.500    | 0.833 | 0.167 | -3.35                       | -3.55 | 3.46  | 3.47  |
| 17     | 0.667    | 0.667 | 0.000 | 3.35                        | 3.49  | -3.44 | -3.49 |
| 18     | 0.833    | 0.833 | 0.167 | -3.35                       | -3.46 | 3.42  | -3.50 |
| 19     | 0.000    | 0.000 | 0.333 | 3.35                        | 3.48  | 3.56  | 3.44  |
| 20     | 0.167    | 0.167 | 0.500 | -3.35                       | -3.45 | -3.53 | 3.58  |
| 21     | 0.333    | 0.000 | 0.333 | 3.35                        | 3.48  | -3.48 | 3.52  |
| 22     | 0.500    | 0.167 | 0.500 | -3.35                       | -3.50 | 3.53  | -3.45 |
| 23     | 0.667    | 0.000 | 0.333 | 3.35                        | -3.51 | -3.46 | 3.49  |
| 24     | 0.833    | 0.167 | 0.500 | -3.35                       | 3.54  | 3.51  | 3.52  |
| 25     | 0.000    | 0.333 | 0.333 | 3.35                        | 3.49  | 3.51  | 3.49  |
| 26     | 0.167    | 0.500 | 0.500 | -3.35                       | 3.53  | -3.47 | -3.45 |
| 27     | 0.333    | 0.333 | 0.333 | 3.35                        | 3.47  | 3.48  | 3.46  |
| 28     | 0.500    | 0.500 | 0.500 | -3.35                       | -3.50 | -3.52 | -3.47 |
| 29     | 0.667    | 0.333 | 0.333 | 3.35                        | -3.52 | -3.42 | -3.57 |
| 30     | 0.833    | 0.500 | 0.500 | -3.35                       | -3.49 | -3.50 | -3.50 |
| 31     | 0.000    | 0.667 | 0.333 | 3.35                        | 3.43  | -3.45 | 3.49  |
| 32     | 0.167    | 0.833 | 0.500 | -3.35                       | -3.48 | 3.49  | -3.43 |
| 33     | 0.333    | 0.667 | 0.333 | 3.35                        | -3.54 | -3.44 | -3.50 |
| 34     | 0.500    | 0.833 | 0.500 | -3.35                       | 3.53  | 3.48  | 3.51  |
| 35     | 0.667    | 0.667 | 0.333 | 3.35                        | 3.48  | 3.52  | -3.53 |
| 36     | 0.833    | 0.833 | 0.500 | -3.35                       | 3.60  | -3.49 | -3.45 |
| 37     | 0.000    | 0.000 | 0.667 | 3.35                        | 3.49  | 3.51  | 3.46  |
| 38     | 0.167    | 0.167 | 0.833 | -3.35                       | -3.49 | 3.53  | 3.45  |
| 39     | 0.333    | 0.000 | 0.667 | 3.35                        | -3.53 | -3.56 | 3.48  |
| 40     | 0.500    | 0.167 | 0.833 | -3.35                       | -3.48 | 3.53  | -3.49 |
| 41     | 0.667    | 0.000 | 0.667 | 3.35                        | 3.47  | 3.51  | -3.54 |
| 42     | 0.833    | 0.167 | 0.833 | -3.35                       | -3.47 | 3.43  | 3.52  |



|    |       |       |       |       |       |       |       |
|----|-------|-------|-------|-------|-------|-------|-------|
| 43 | 0.000 | 0.333 | 0.667 | 3.35  | 3.47  | -3.53 | -3.46 |
| 44 | 0.167 | 0.500 | 0.833 | -3.35 | 3.54  | -3.53 | -3.46 |
| 45 | 0.333 | 0.333 | 0.667 | 3.35  | -3.52 | 3.51  | 3.41  |
| 46 | 0.500 | 0.500 | 0.833 | -3.35 | -3.51 | -3.55 | -3.45 |
| 47 | 0.667 | 0.333 | 0.667 | 3.35  | 3.43  | -3.47 | 3.52  |
| 48 | 0.833 | 0.500 | 0.833 | -3.35 | -3.46 | 3.48  | -3.54 |
| 49 | 0.000 | 0.667 | 0.667 | 3.35  | 3.51  | -3.58 | 3.44  |
| 50 | 0.167 | 0.833 | 0.833 | -3.35 | 3.46  | -3.45 | -3.45 |
| 51 | 0.333 | 0.667 | 0.667 | 3.35  | 3.53  | -3.55 | 3.42  |
| 52 | 0.500 | 0.833 | 0.833 | -3.35 | 3.44  | -3.50 | 3.51  |
| 53 | 0.667 | 0.667 | 0.667 | 3.35  | 3.48  | -3.59 | -3.54 |
| 54 | 0.833 | 0.833 | 0.833 | -3.35 | 3.53  | -3.50 | -3.55 |

---
